# Supplementary material for: Rosettes integrity protects Plasmodium vivax of being phagocytized
Source: PubMed Central journal article supplement (PMC7541459; doi:10.1038/s41598-020-73713-w), 2020-10-07

## Supplementary Information

**Title:** Rosettes integrity protects *Plasmodium vivax* of being phagocytized

Letusa Albrecht<sup>1,2,\*</sup>, Stefanie C.P. Lopes<sup>3,4</sup>, Ana Beatriz Iung Enembreck da Silva<sup>1</sup>,  
Vanessa Barbosa<sup>3,4</sup>, Rodrigo P. Almeida<sup>1</sup>, André M. Siqueira<sup>5</sup>, Juliana Almeida Leite<sup>2</sup>,  
Najara C. Bittencourt<sup>2</sup>, Hellen Geremias dos Santos<sup>1</sup>, Catarina Bourgard<sup>2</sup>, Luiz Fernando  
Cardoso Garcia<sup>1</sup>, Ana Carolina A. V. Kayano<sup>1,2</sup>, Irene S. Soares<sup>6</sup>, Bruce Russell<sup>7</sup>, Laurent  
Rénia<sup>8</sup>, Marcus V. G. Lacerda<sup>3,4</sup> and Fabio T.M. Costa<sup>2,\*</sup>

<sup>1</sup>Laboratório de Pesquisa em Apicomplexa, Instituto Carlos Chagas, Fiocruz Paraná,  
Curitiba, PR, Brazil.

<sup>2</sup>Laboratório de Doenças Tropicais, Departamento de Genética, Evolução, Microbiologia  
e Imunologia, Instituto de Biologia, Universidade Estadual de Campinas (UNICAMP),  
Campinas, SP, Brazil.

<sup>3</sup>Fundação de Medicina Tropical Dr. Heitor Vieira Dourado, Gerência de Malária,  
Manaus, AM, Brazil.

<sup>4</sup>Instituto Leônidas & Maria Deane, Fiocruz Amazônia, Manaus, AM, Brazil.

<sup>5</sup>Instituto Nacional de Infectologia Evandro Chagas, Fiocruz Rio de Janeiro, RJ, Brazil.

<sup>6</sup>Department of Clinical and Toxicological Analyses, School of Pharmaceutical Sciences,  
University of Sao Paulo, São Paulo, SP, Brazil.

<sup>7</sup>Department of Microbiology and Immunology, University of Otago, Dunedin, New  
Zealand.

<sup>8</sup>Singapore Immunology Network, Agency for Science, Technology and Research,  
Singapore, Singapore.

\*LA: [letusa.albrecht@fiocruz.br](mailto:letusa.albrecht@fiocruz.br) or [letusaa@gmail.com](mailto:letusaa@gmail.com)

SL: stefaniecplopes@gmail.com

ABIES: iungbeatriz@gmail.com

VB: vanessa.barbosars@hotmail.com

RPA: rod.pma@gmail.com

AMS: amsiqueira@gmail.com

JAL: ju.leite84@gmail.com

NCB: najaracb@gmail.com

HGS: hellen.santos@fiocruz.br

CB: catbourgard@gmail.com

LFCG: fgtc@outlook.com

ACAVK: carolavk@gmail.com

ISS: isoares@usp.br

BR: b.russell@otago.ac.nz

LR: renia\_laurent@immunol.a-star.edu.sg

ML: marcuslacerda.br@gmail.com

\*FTMC: fabiotmc72@gmail.com

\*Corresponding authors.

## Supplementary Information

**Supplementary Figure S1 - *P. vivax* rosetting frequency.** Rosetting rates in 81 *P. vivax* isolates in the presence of autologous plasma. **(A)** Frequency distribution of rosettes among the isolates. **(B)** Boxplot showing median and interquartile ranges of rosetting rates.

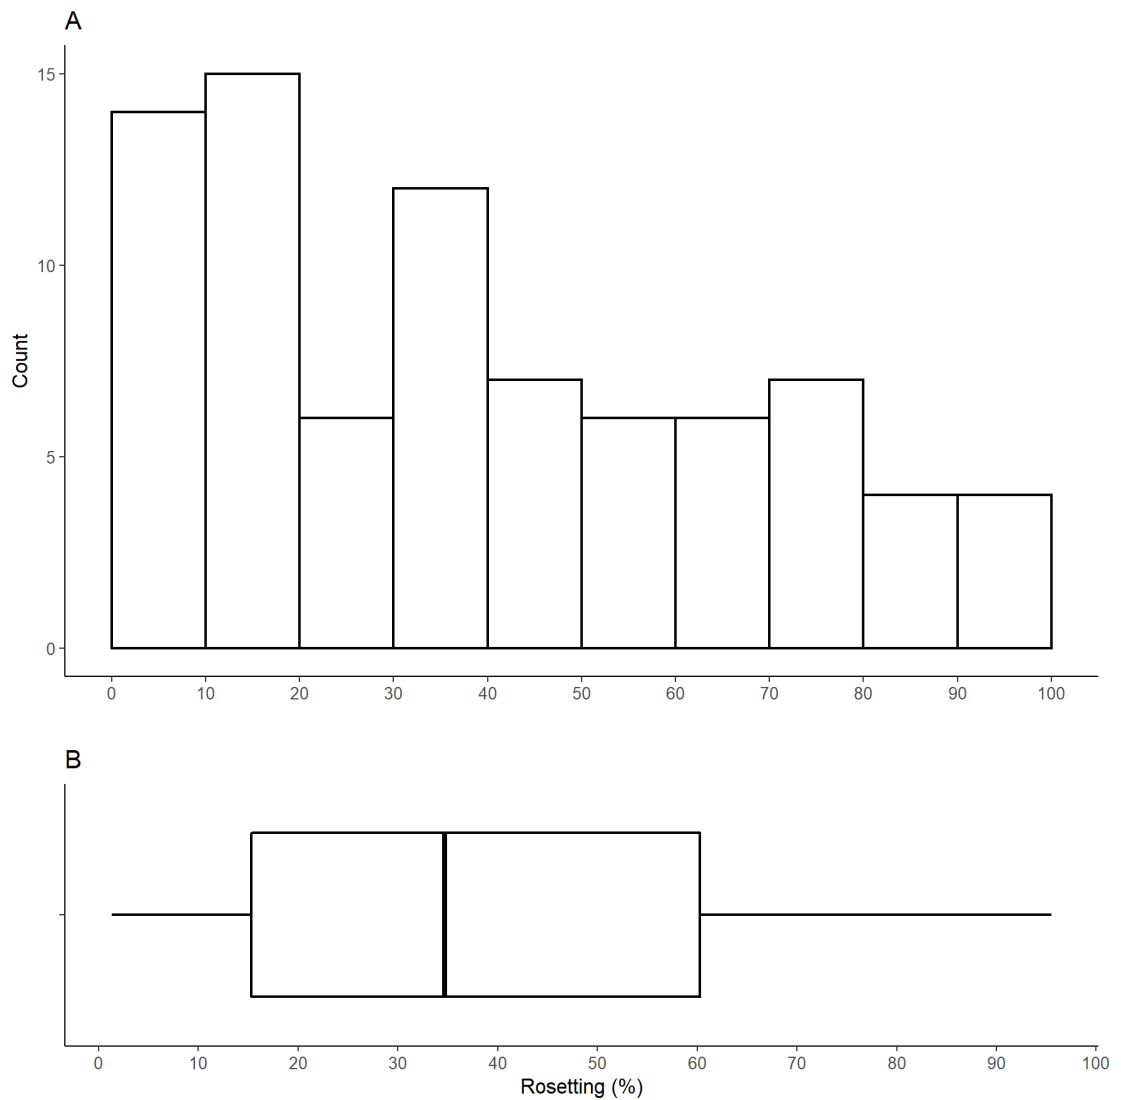

**Supplementary Figure S2 - Platelet and haematocrit levels of patients infected**

**with *P. vivax*.** (A) No statistical correlation was observed when rosetting rates were compared with platelet (Pearson correlation coefficient  $r = 0.09$ ,  $p = 0.60$ ,  $n = 38$ ) or (B) haematocrit levels (Pearson correlation coefficient  $r = -0.06$ ,  $p = 0.70$ ,  $n = 38$ ) of patients infected with *P. vivax*.

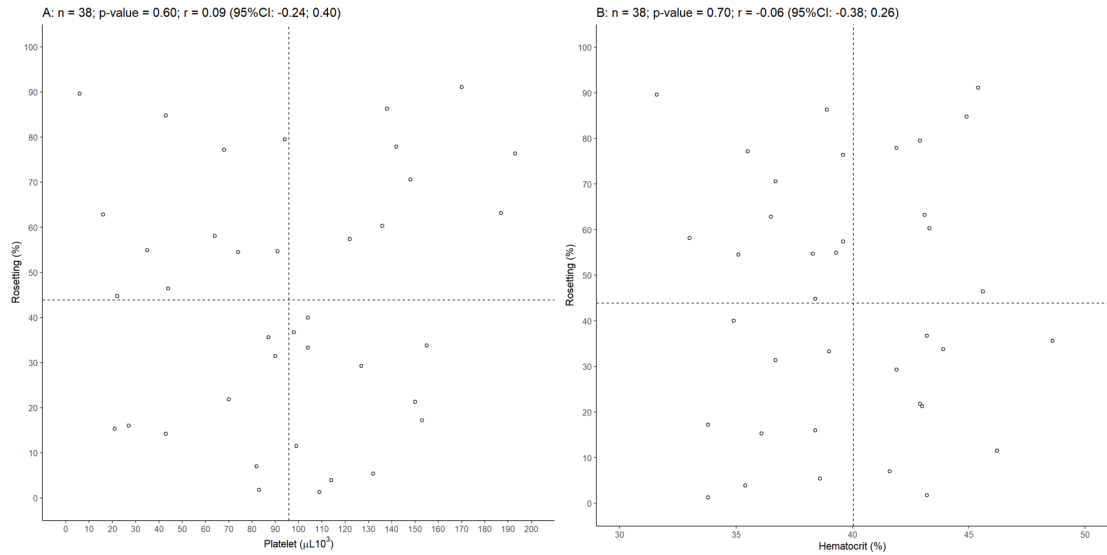

**Supplementary Figure S3. (A)** The binding of IgM and **(B)** IgG to red blood cells (Spearman's correlation coefficient  $\rho=0.16$ ,  $p = 0.38$ ,  $n = 32$ , and  $\rho= 0.10$ ,  $p = 0.58$ ,  $n = 35$ , respectively).

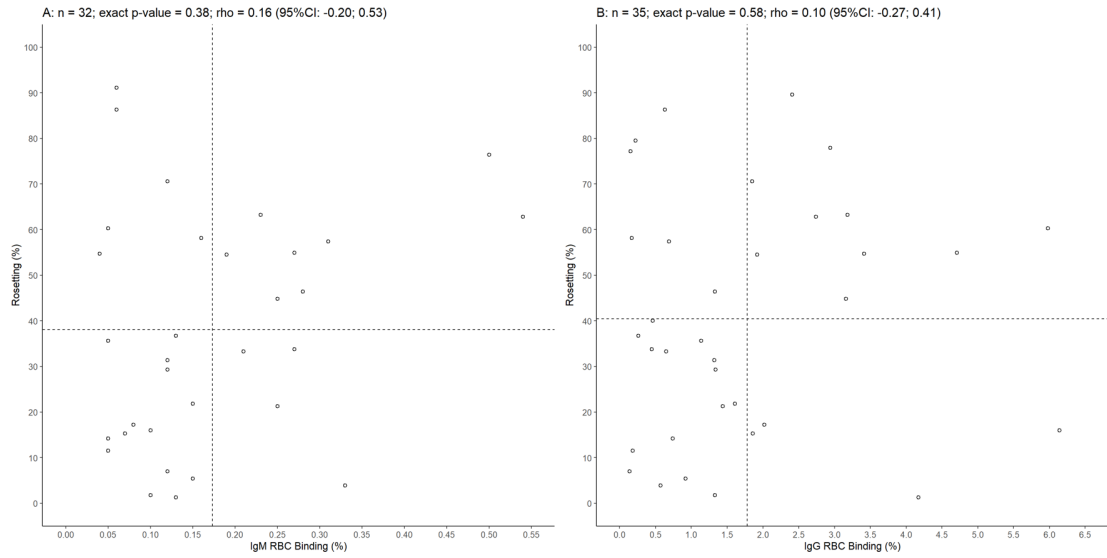

**Supplementary Figure S4 - Correlation between cytokine levels and parasitemia.** (A) Correlation between IL-6 and IL-10 plasmatic levels (Spearman's test,  $\rho = 0.54$ ,  $p < 0.05$ ,  $n = 30$ ). (B) Correlation between log IL-6 and parasitemia (Spearman's test,  $\rho = 0.08$ ,  $p = 0.64$ ,  $n = 33$ ). (C) Correlation between log IL-10 and parasitemia (Spearman's test,  $\rho = 0.08$ ,  $p = 0.65$ ,  $n = 30$ ). (D) Parasitemia in patients with detectable or not detectable IFN- $\gamma$  (Student's t-test,  $p = 0.36$  and  $n = 37$ ).

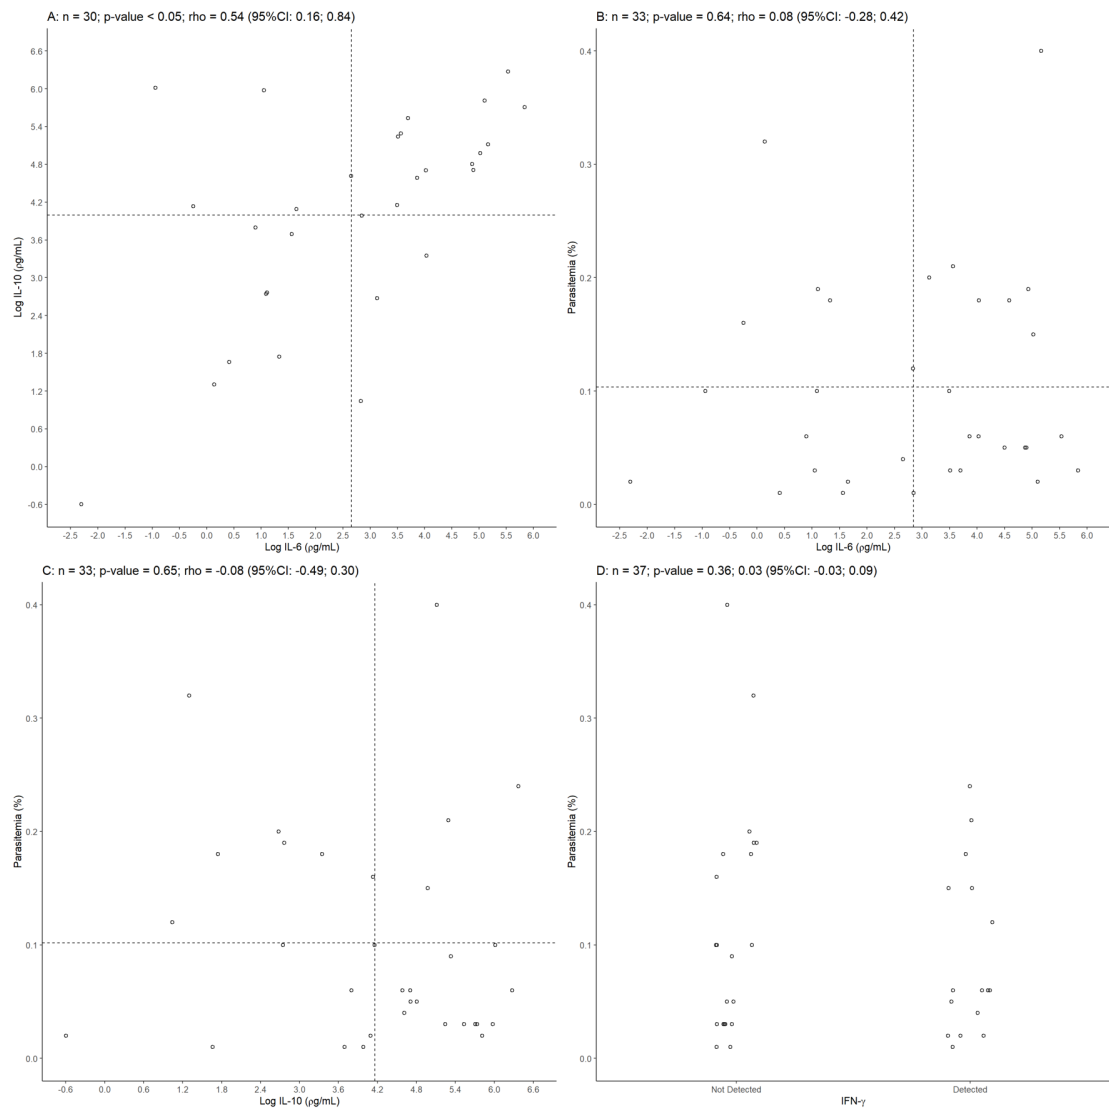

**Supplementary Figure S5 - Representative images of *P. vivax* rosettes.** Parasites were stained with acridine orange and visualized in optical microscopy. **(A)** Non-rosetting *P. vivax* parasite bound to only one red blood cell (RBC), not characterizing a rosette. **(B-C)** More than two non-infected RBCs binding to an infected RBC, forming a rosette.

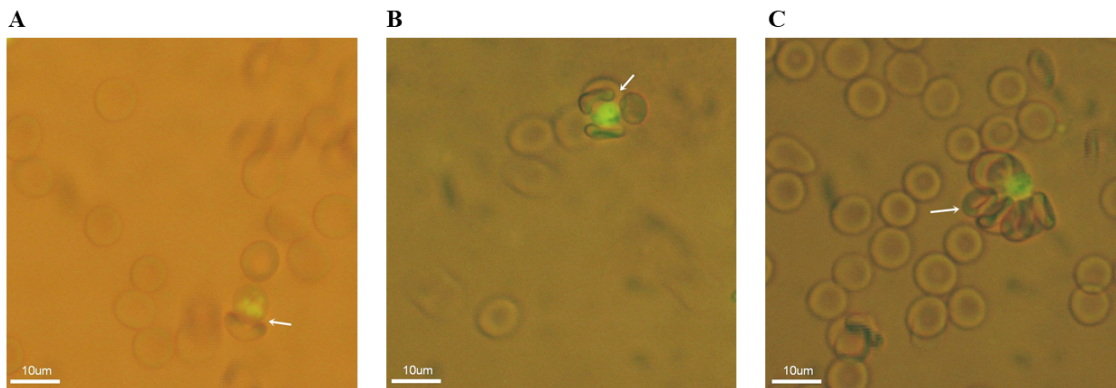

Supplement: 41598_2020_73713_MOESM1_ESM.pdf [file 41598_2020_73713_MOESM1_ESM.pdf]
